# Supplementary material
Source: publisher site journal article supplement (https://www.spandidos-publications.com/8079/downloadSupplementary)
Supplement: Supplementary file 1 [file downloadSupplementary]

## Sheet: Sheet
Table SI. The list of 100 DRGs compiled through systematic literature curation.
Category	Genes	Rationale	(Refs.)
Core mechanistic genes	NCKAP1, RPN1, SLC3A2, SLC7A11, RAC1	Foundational genes important for cystine transport, disulfide stress response and RAC1-WAVE pathway activation in disulfidptosis, identified via CRISPR-Cas9 screens (normZ scores) and functional validations in SLC7A11-high cells under glucose starvation.Suppressors include NCKAP1, RPN1, SLC3A2, SLC7A11; RAC1 as promoter.	16,18,19,26
Actin cytoskeleton and associated proteins	ABI2, ACTB, ACTN1, ACTN2, ACTN3, ACTN4, BRK1, CAPZB, CD2AP, CYFIP1, DBN1, DSTN, FLNA, FLNB, FLNC, INF2, IQGAP1, MYH1, MYH10, MYH11, MYH13, MYH14, MYH2, MYH3, MYH4, MYH6, MYH7, MYH7B, MYH8, MYH9, MYL6, MYL6B, PDLIM1, TLN1, TLN2, WASF2	Disulfidptosis is characterized by the collapse of the actin cytoskeleton via aberrant disulfide bonds. This group includes actin, myosins, filamins, and WAVE regulatory complex components identified via chemical proteomics (90 peptides with ≥1.5-fold disulfide increase) and CRISPR screens, with validations in cancer models showing F-actin collapse. Examples: MYH9, TLN1 with disulfide-linked pept…	16,18,23,25,26
Glucose and energy metabolism	CNOT1, DECR1, EPAS1, GYS1, LRPPRC, NDUFA10, NDUFA11, NDUFC1, NDUFS1, NDUFS2, NUBPL, OXSM, PPM1F, SLC2A1	Disulfidptosis is triggered by glucose starvation and subsequent NADPH depletion. This category includes genes central to glucose transport, glycolysis, and mitochondrial function, identified as potential synergistics/promoters (normZ <0 in CRISPR screens) in foundational and cancer-specific studies. Examples: GYS1, NDUFS1 as risk factors in LUAD/HCC.	16,19,25,26
Genes from pan-cancer and specific cancer studies	AAAS, ANP32E, ARMC6, ATXN10, BOP1, CHCHD3, CHD4, DHX9, FANCI, GCN1L1, GTF2I, HNRNPA3, HNRNPH1, HNRNPH2, HNRNPH3, HNRNPM, HNRNPU, IPO4, IPO7, MRPS17, NLN, NSUN2, PCBP1, PCBP2, PCBP3, PML, PRC1, PRDX1, RNH1, RPA1, RRP1, RUFY1, SAFB, SAFB2, SAMM50, SART3, SMPD4, SPG20, SQSTM1, STRAP, TARDBP, TNKS1BP1, TRIP6, UBASH3B, ZHX2	This group comprises genes identified as significant DRGs through comprehensive bioinformatic analyses in recent studies focusing on specific cancers such as hepatocellular carcinoma, lung adenocarcinoma, colon cancer, gastric cancer and thyroid carcinoma. They are often part of prognostic models or define molecular subtypes, with associations to immune checkpoints (such as, PRDX1 as risk factor)…	16-26
DRGs, disulfidptosis-related genes.
